# Supplementary material for: Identification of SLC3A2 as a Potential Therapeutic Target of Osteoarthritis Involved in Ferroptosis by Integrating Bioinformatics, Clinical Factors and Experiments
Source: MDPI journal article supplement (doi:10.3390/cells11213430), 2022-10-30

**Figure captions:**

**Figure S2:** Potential association between SLC3A2, ferroptosis, and osteoarthritis in pre-clinical and clinical settings.

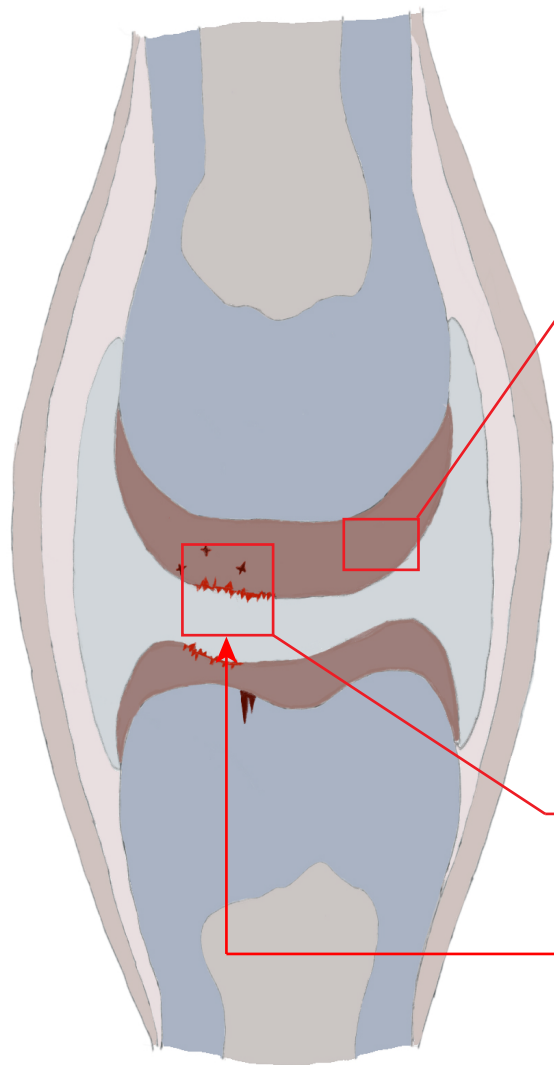

Pre-clinical

SLC3A2  
STABLE

Clinical factors:  
BMI; K-L grade;  
obesity

Clinical

SLC3A2  
DOWN

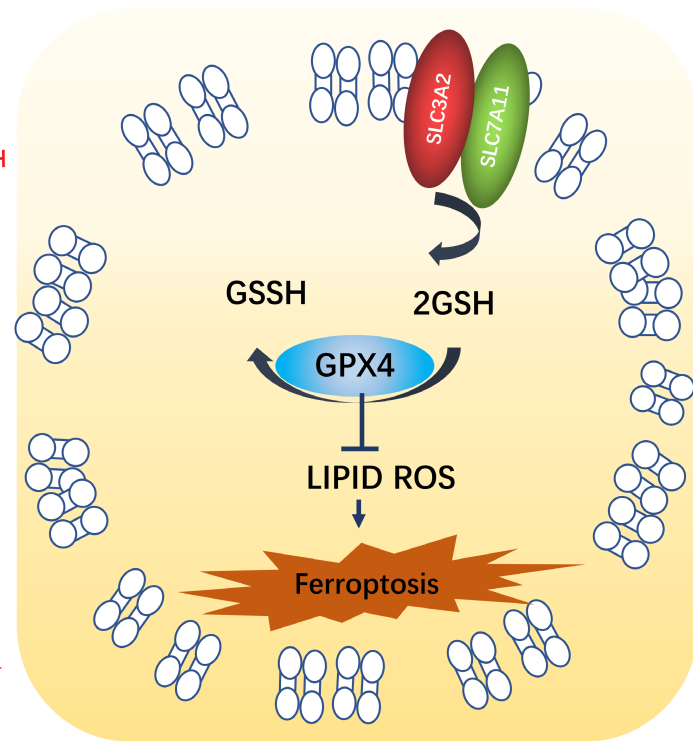

Supplement: s1 [file s1]
