# Supplementary material for: Identification of SLC3A2 as a Potential Therapeutic Target of Osteoarthritis Involved in Ferroptosis by Integrating Bioinformatics, Clinical Factors and Experiments
Source: MDPI journal article supplement (doi:10.3390/cells11213430), 2022-10-30
Supplement: s1 [file s1]

Supplementary Table 1. Basic information of GEO datasets

| GEO       | Type    | Platform | Tissue    | Samples |    |       | Country |
|-----------|---------|----------|-----------|---------|----|-------|---------|
|           |         |          |           | Normal  | OA | Total |         |
| GSE114007 | RNA-seq | GPL11154 | Cartilage | 18      | 20 | 38    | USA     |
|           |         | GPL18573 |           |         |    |       |         |
| GSE169077 | Array   | GPL96    | Cartilage | 5       | 6  | 11    | USA     |
