# Supplementary material for: Identification of SLC3A2 as a Potential Therapeutic Target of Osteoarthritis Involved in Ferroptosis by Integrating Bioinformatics, Clinical Factors and Experiments
Source: Cells. 2022 Oct 30;11(21):3430. doi: 10.3390/cells11213430 (PMC9657506; doi:10.3390/cells11213430)
Supplement: Supplementary file 1 [file cells-11-03430-s001.zip]

Archive with 7 entries (7 files):
- Supplementary Figure S1.ai
- Supplementary Figure S1.pdf
- Supplementary Figure S2.ai
- Supplementary figure S2.pdf
- Supplementary Table S1.pdf
- Supplementary Table S2.xlsx
- Supplementary Table S3.xlsx
