# Supplementary material for: Identification of SLC3A2 as a Potential Therapeutic Target of Osteoarthritis Involved in Ferroptosis by Integrating Bioinformatics, Clinical Factors and Experiments
Source: Cells. 2022 Oct 30;11(21):3430. doi: 10.3390/cells11213430 (PMC9657506; doi:10.3390/cells11213430)
Supplement: Supplementary file 1 [file cells-11-03430-s001.zip › Supplementary Table S2.xlsx]

## Sheet: ALL
driver	suppressor	marker
RPL8	SLC7A11	PTGS2
IREB2	GPX4	DUSP1
ATP5MC3	AKR1C1	NOS2
CS	AKR1C2	NCF2
EMC2	AKR1C3	MT3
ACSF2	RB1	UBC
NOX1	HSPB1	ALB
CYBB	HSF1	TXNRD1
NOX3	GCLC	SRXN1
NOX4	NFE2L2	GPX2
NOX5	SQSTM1	BNIP3
DUOX1	NQO1	OXSR1
DUOX2	HMOX1	SELENOS
G6PD	FTH1	ANGPTL7
PGD	MUC1	CHAC1
VDAC2	SLC3A2	SLC7A11
PIK3CA	MT1G	DDIT4
FLT3	SLC40A1	LOC284561
SCP2	CISD1	ASNS
TP53	FANCD2	TSC22D3
ACSL4	FTMT	DDIT3
LPCAT3	HSPA5	JDP2
NRAS	ATF4	SESN2
KRAS	TP53	SLC1A4
HRAS	HELLS	PCK2
TF	SCD	TXNIP
TFRC	FADS2	VLDLR
TFR2	SRC	GPT2
SLC38A1	STAT3	PSAT1
SLC1A5	PML	LURAP1L
GLS2	MTOR	SLC7A5
GOT1	NFS1	HERPUD1
CARS1	TP63	XBP1
ALOX5	CDKN1A	ATF3
KEAP1	MIR137	SLC3A2
HMOX1	ENPP2	CBS
ATG5	VDAC2	ATF4
ATG7	FH	ZNF419
NCOA4	CISD2	KLHL24
ALOX12	MIR9-1	TRIB3
ALOX12B	MIR9-2	ZFP69B
ALOX15	MIR9-3	ATP6V1G2
ALOX15B	CBS	VEGFA
ALOXE3	ISCU	GDF15
PHKG2	ACSL3	TUBE1
ACO1	OTUB1	ARRDC3
G6PDX	CD44	CEBPG
ULK1	LINC00336	SNORA16A
ATG3	BRD4	RGS4
ATG4D	PRDX6	BLOC1S5-TXNDC5
BECN1	MIR17	LOC390705
MAP1LC3A	SESN2	EIF2S1
GABARAPL2	NF2	KIM-1
GABARAPL1	ARNTL	IL6
ATG16L1	HIF1A	CXCL2
WIPI1	JUN	RELA
WIPI2	CA9	HSD17B11
SNX4	TMBIM4	AGPAT3
ATG13	PLIN2	SETD1B
ULK2	MIR212	HMOX1
SAT1	Fer1HCH	TF
EGFR	AIFM2	FTL
MAPK3	LAMP2	RPL8
MAPK1	ZFP36	ATP5MC3
BID	PROM2	TFRC
ZEB1	CHMP5	MAFG
DPP4	CHMP6	IL33
CDKN2A	CAV1	FTH1
PEBP1	GCH1	SLC40A1
SOCS1	SIRT3	GPX4
CDO1	DAZAP1	HAMP
MYB	PIR	HSPB1
MAPK8	FTL	NFE2L2
MAPK9	HCAR1	STEAP3
CHAC1	SLC16A1	DRD5
MAPK14	RRM2	DRD4
LINC00472	NR4A1	MAP3K5
PRKAA2	PIK3CA	MAPK14
PRKAA1	RPTOR	SLC2A1
ELAVL1	SREBF1	SLC2A3
BAP1	SREBF2	SLC2A6
ABCC1	FZD7	SLC2A8
MIR6852	P4HB	SLC2A12
ACVR1B	NT5DC2	GLUT13
TGFBR1	BCAT2	SLC2A14
EPAS1	PLA2G6	EIF2AK4
HILPDA	MIR424	ALOX5
HIF1A	PARK7	ALOX12
IFNG	FXN	ALOX15
ANO6	SUV39H1	ACSF2
LPIN1	ATF2	IREB2
HMGB1	ACOT1	HMGB1
TNFAIP3	ALDH3A2	ELAVL1
TLR4	STK11	TFAP2C
ATF3	FNDC5	SP1
ATM	CircIL4R	HBA1
YY1AP1	CDH1	NNMT
EGLN2	MIR214	PLIN4
MIOX	NEDD4L	HIC1
TAZ	TF	STMN1
MTDH	BRD2	RRM2
IDH1	BRD3	CAPG
SIRT1	BRDT	HNF4A
FBXW7	DECR1	NGB
PANX1	GLRX5	YWHAE
DNAJB6	NCOA3	GABPB1
BACH1	NR5A2	AURKA
LONP1	PANX2	MIR4715
CD82	RHEBP1	RIPK1
IL1B	TFAP2A	PRDX1
CTSB	CP	MIR30B
POR	ARF6	MMP13
CYB5R1	GDF15	LRRFIP1
ELOVL5	ABHD12
FADS1	PPP1R13L
FBW7	TFAM
PTEN	KDM3B
NR1D1	RNF113A
NR1D2	AHCY
TBK1	circ-TTBK2
IL6	MIR522
USP7	IDH2
miR-182-5p	PPARA
miR-378a-3p	NOS2
ATF4	SIAH2
AQP3	RELA
AQP5	PRKAA2
AQP8	VDR
LINC00618	NEDD4
MT1DP	PRDX1
PEX10	AR
AGPAT3	MTF1
PEX12
CHP1
GPAT4
BRPF1
OSBPL9
INTS2
MMD
CYP4F8
MLLT1
TTPA
GRIA3
EPT1
POM121L12
LIG3
AEBP2
AGPS
CDCA3
PEX2
PEX6
TIMM9
DCAF7
LCE2C
FAR1
PHF21A
SMAD7
LYRM1
AMN
PEX3
MTCH1
ACADSB
PVT1
hsa_circ_0008367
SLC39A14
MAP3K11
GSK3B
BRD7
SLC25A28
MFN2
SLC11A2
ZFAS1
TSC1
TGFB1
SNCA
SIRT3
CGAS
STING1
HDDC3
MIR761
MDM2
MDM4
MIR214
DLD
WWTR1
PRKCA

## Sheet: remove duplicates
RPL8
IREB2
ATP5MC3
CS
EMC2
ACSF2
NOX1
CYBB
NOX3
NOX4
NOX5
DUOX1
DUOX2
G6PD
PGD
VDAC2
PIK3CA
FLT3
SCP2
TP53
ACSL4
LPCAT3
NRAS
KRAS
HRAS
TF
TFRC
TFR2
SLC38A1
SLC1A5
GLS2
GOT1
CARS1
ALOX5
KEAP1
HMOX1
ATG5
ATG7
NCOA4
ALOX12
ALOX12B
ALOX15
ALOX15B
ALOXE3
PHKG2
ACO1
G6PDX
ULK1
ATG3
ATG4D
BECN1
MAP1LC3A
GABARAPL2
GABARAPL1
ATG16L1
WIPI1
WIPI2
SNX4
ATG13
ULK2
SAT1
EGFR
MAPK3
MAPK1
BID
ZEB1
DPP4
CDKN2A
PEBP1
SOCS1
CDO1
MYB
MAPK8
MAPK9
CHAC1
MAPK14
LINC00472
PRKAA2
PRKAA1
ELAVL1
BAP1
ABCC1
MIR6852
ACVR1B
TGFBR1
EPAS1
HILPDA
HIF1A
IFNG
ANO6
LPIN1
HMGB1
TNFAIP3
TLR4
ATF3
ATM
YY1AP1
EGLN2
MIOX
TAZ
MTDH
IDH1
SIRT1
FBXW7
PANX1
DNAJB6
BACH1
LONP1
CD82
IL1B
CTSB
POR
CYB5R1
ELOVL5
FADS1
FBW7
PTEN
NR1D1
NR1D2
TBK1
IL6
USP7
miR-182-5p
miR-378a-3p
ATF4
AQP3
AQP5
AQP8
LINC00618
MT1DP
PEX10
AGPAT3
PEX12
CHP1
GPAT4
BRPF1
OSBPL9
INTS2
MMD
CYP4F8
MLLT1
TTPA
GRIA3
EPT1
POM121L12
LIG3
AEBP2
AGPS
CDCA3
PEX2
PEX6
TIMM9
DCAF7
LCE2C
FAR1
PHF21A
SMAD7
LYRM1
AMN
PEX3
MTCH1
ACADSB
PVT1
hsa_circ_0008367
SLC39A14
MAP3K11
GSK3B
BRD7
SLC25A28
MFN2
SLC11A2
ZFAS1
TSC1
TGFB1
SNCA
SIRT3
CGAS
STING1
HDDC3
MIR761
MDM2
MDM4
MIR214
DLD
WWTR1
PRKCA
SLC7A11
GPX4
AKR1C1
AKR1C2
AKR1C3
RB1
HSPB1
HSF1
GCLC
NFE2L2
SQSTM1
NQO1
FTH1
MUC1
SLC3A2
MT1G
SLC40A1
CISD1
FANCD2
FTMT
HSPA5
HELLS
SCD
FADS2
SRC
STAT3
PML
MTOR
NFS1
TP63
CDKN1A
MIR137
ENPP2
FH
CISD2
MIR9-1
MIR9-2
MIR9-3
CBS
ISCU
ACSL3
OTUB1
CD44
LINC00336
BRD4
PRDX6
MIR17
SESN2
NF2
ARNTL
JUN
CA9
TMBIM4
PLIN2
MIR212
Fer1HCH
AIFM2
LAMP2
ZFP36
PROM2
CHMP5
CHMP6
CAV1
GCH1
DAZAP1
PIR
FTL
HCAR1
SLC16A1
RRM2
NR4A1
RPTOR
SREBF1
SREBF2
FZD7
P4HB
NT5DC2
BCAT2
PLA2G6
MIR424
PARK7
FXN
SUV39H1
ATF2
ACOT1
ALDH3A2
STK11
FNDC5
CircIL4R
CDH1
NEDD4L
BRD2
BRD3
BRDT
DECR1
GLRX5
NCOA3
NR5A2
PANX2
RHEBP1
TFAP2A
CP
ARF6
GDF15
ABHD12
PPP1R13L
TFAM
KDM3B
RNF113A
AHCY
circ-TTBK2
MIR522
IDH2
PPARA
NOS2
SIAH2
RELA
VDR
NEDD4
PRDX1
AR
MTF1
PTGS2
DUSP1
NCF2
MT3
UBC
ALB
TXNRD1
SRXN1
GPX2
BNIP3
OXSR1
SELENOS
ANGPTL7
DDIT4
LOC284561
ASNS
TSC22D3
DDIT3
JDP2
SLC1A4
PCK2
TXNIP
VLDLR
GPT2
PSAT1
LURAP1L
SLC7A5
HERPUD1
XBP1
ZNF419
KLHL24
TRIB3
ZFP69B
ATP6V1G2
VEGFA
TUBE1
ARRDC3
CEBPG
SNORA16A
RGS4
BLOC1S5-TXNDC5
LOC390705
EIF2S1
KIM-1
CXCL2
HSD17B11
SETD1B
MAFG
IL33
HAMP
STEAP3
DRD5
DRD4
MAP3K5
SLC2A1
SLC2A3
SLC2A6
SLC2A8
SLC2A12
GLUT13
SLC2A14
EIF2AK4
TFAP2C
SP1
HBA1
NNMT
PLIN4
HIC1
STMN1
CAPG
HNF4A
NGB
YWHAE
GABPB1
AURKA
MIR4715
RIPK1
MIR30B
MMP13
LRRFIP1
