# Supplementary material for: Identification of SLC3A2 as a Potential Therapeutic Target of Osteoarthritis Involved in Ferroptosis by Integrating Bioinformatics, Clinical Factors and Experiments
Source: Cells. 2022 Oct 30;11(21):3430. doi: 10.3390/cells11213430 (PMC9657506; doi:10.3390/cells11213430)
Supplement: Supplementary file 1 [file cells-11-03430-s001.zip › Supplementary Table S3.xlsx]

## Sheet: Sheet1
Supplementary Table S3.
The demographic characteristics of the GSE114007 dataset
Samples	Age	Gender	OA grade
NA-1	35	female	1
NA-2	57	female	1
NA-3	26	male	1
NA-4	18	male	1
NA-5	28	male	1
NA-6	20	male	1
NA-7	34	male	1
NA-8	44	male	1
NA-9	61	male	1
NA-10	31	male	1
NA-11	39	female	1
NA-12	52	female	1
NA-13	34	male	1
NA-14	27	female	1
NA-15	33	male	1
NA-16	56	male	1
NA-17	18	male	1
NA-18	46	male	1
OA-1	75	female	1
OA-2	71	male	4
OA-3	82	female	4
OA-4	62	female	4
OA-5	69	female	4
OA-6	70	male	4
OA-7	68	female	4
OA-8	66	male	4
OA-9	66	male	4
OA-10	68	male	4
OA-11	52	female	4
OA-12	57	female	4
OA-13	67	female	4
OA-14	60	male	4
OA-15	51	male	4
OA-16	67	male	4
OA-17	62	female	4
OA-18	69	female	4
OA-19	71	female	4
OA-20	71	female	4
